# Supplementary material for: 1H‐NMR screening for the high‐throughput determination of genotype and environmental effects on the content of asparagine in wheat grain
Source: PubMed Central journal article supplement (PMC4949679; doi:10.1111/pbi.12364), 2015-03-27

Figure S1. Mean concentrations (mg/g d.m.) of asparagine in different cereal wholemeal samples grown at a single site in Hungary in 2005. A: error bars represent mean concentration  $\pm$  standard deviation; B: Error bars represent the range observed across cultivars. Number of analysed cultivars are indicated at the top of each bar

**A**

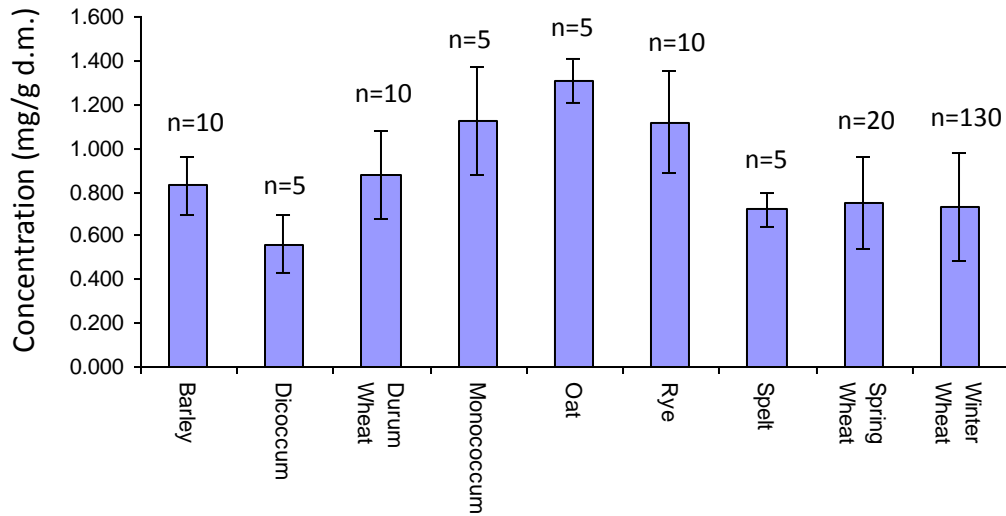

**B**

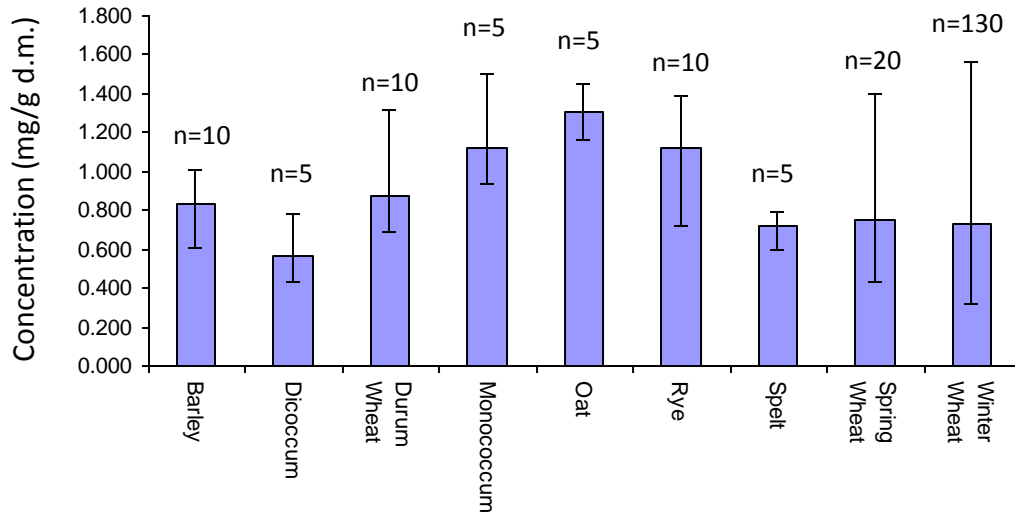

**Figure S2:** Temperature and precipitation data for 6 growing environments used (2005-2007). A: Temperature; B: Precipitation

**A**

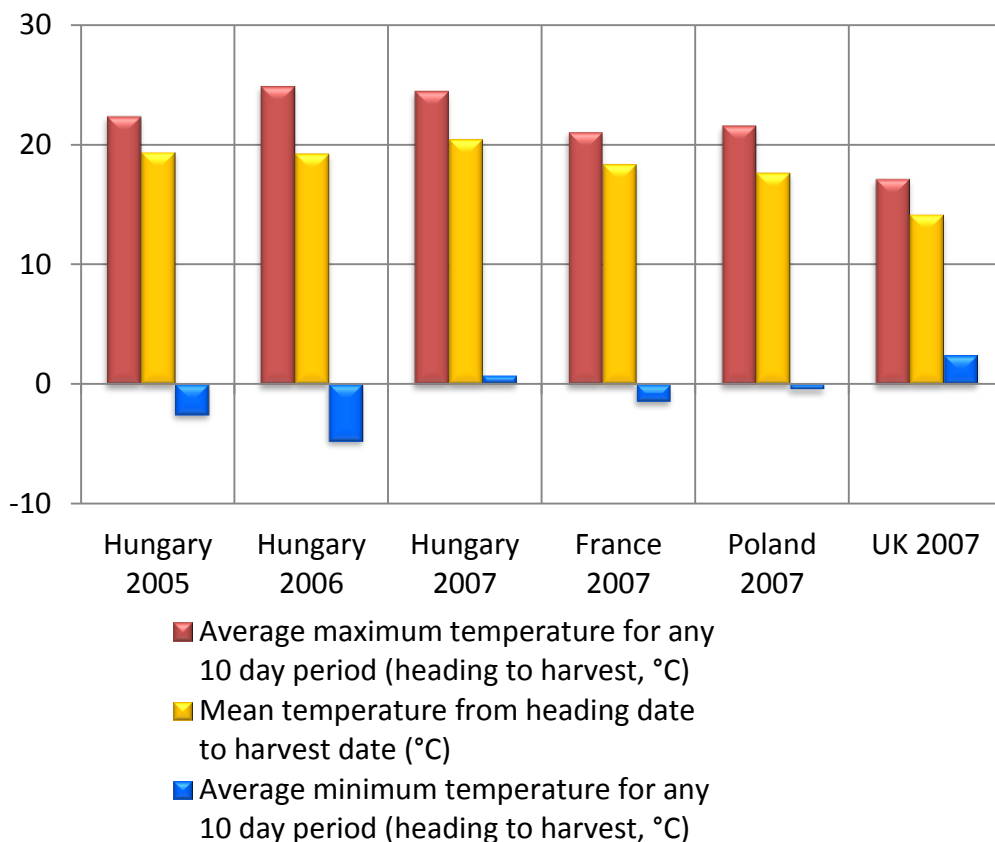

**B**

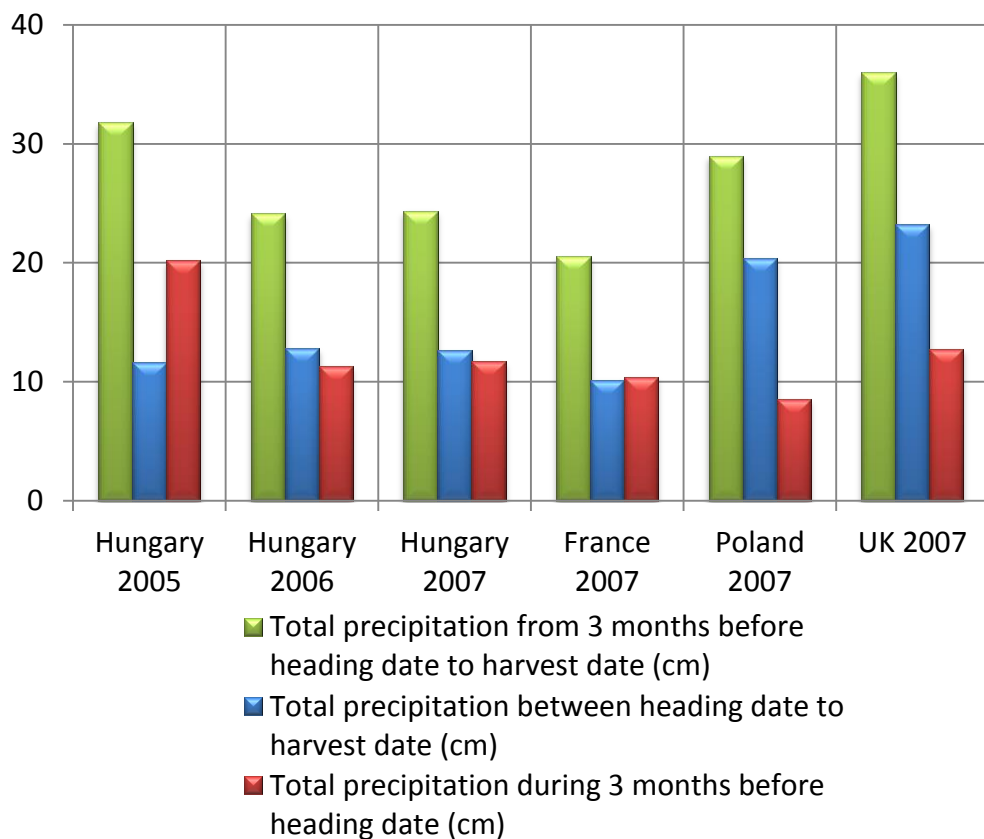

Figure S3. Mean concentrations (mg/g d.m.) of asparagine in winter and spring wheat wholemeal samples grouped by decade of registration. Number of analysed cultivars per decade are indicated at the top of each bar

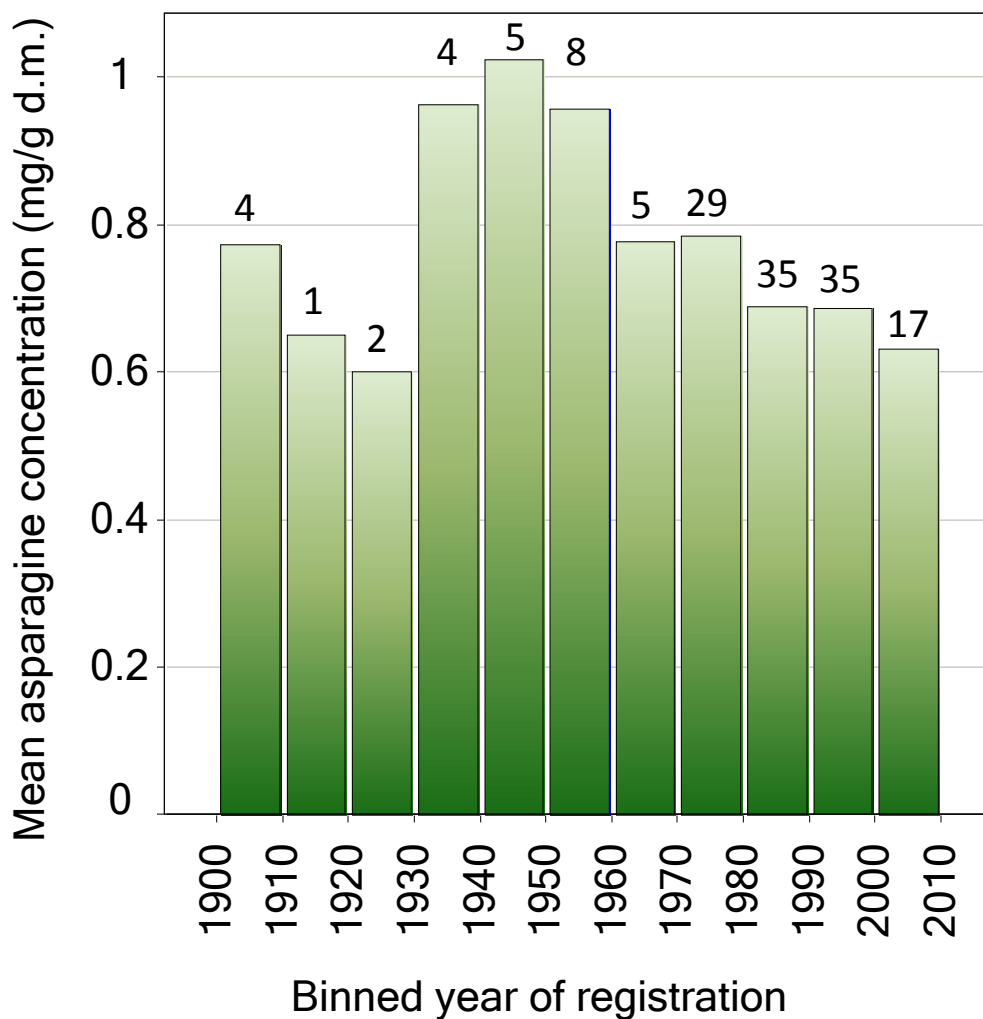

Supplement: PBI-14-128-s001.pdf [file PBI-14-128-s001.pdf]
